# Supplementary material for: TWIST1 induces MMP3 expression through up-regulating DNA hydroxymethylation and promotes catabolic responses in human chondrocytes
Source: PubMed Central journal article supplement (PMC5318945; doi:10.1038/srep42990), 2017-02-21
Supplement: srep42990-s1.pdf [file srep42990-s1.pdf]

## Supplementary Figure

**Joe Hasei<sup>1</sup>, Takeshi Teramura<sup>1, 2</sup>, Toshiyuki Takehara<sup>2</sup>, Yuta Onodera<sup>2</sup>, Takuro Horii<sup>3</sup>, Merissa Olmer<sup>1</sup>, Izuho Hatada<sup>3</sup>, Kanji Fukuda<sup>2, 4</sup>, Toshifumi Ozaki<sup>5</sup>, Martin K. Lotz<sup>1</sup> and Hiroshi Asahara<sup>1, 6</sup>**

**<sup>1</sup>Department of Molecular and Experimental Medicine, The Scripps Research Institute, La Jolla, CA, USA.**

**<sup>2</sup>Division of Cell Biology for Regenerative Medicine, Institute of Advanced Clinical Medicine, Kindai University, Faculty of Medicine, Osaka, Japan.**

**<sup>3</sup>Laboratory of Genome Science, Biosignal Genome Resource Center, Institute for Molecular and Cellular Regulation, Gunma University, Gunma, Japan.**

**<sup>4</sup>Department of Rehabilitation Medicine, Kindai University, Faculty of Medicine, Osaka, Japan.**

**<sup>5</sup>Science of Functional Recovery and Reconstruction, Okayama University Graduate School of Medicine, Dentistry and Pharmaceutical Sciences, Okayama, Japan**

**<sup>6</sup>Department of Systems BioMedicine, Graduate School of Medical and Dental Sciences, Tokyo Medical and Dental University, Tokyo, Japan.**

**TWIST1 induces MMP3 expression through up-regulating DNA hydroxymethylation and promotes catabolic responses in human chondrocytes**

### **Supplementary Figure S1**

The TETs expression in normal and OA-affected human cartilage tissue.

### **Supplementary Figure S2**

The TETs expression change after IL-1 $\beta$  or TNF $\alpha$  stimulation in human chondrocyte.

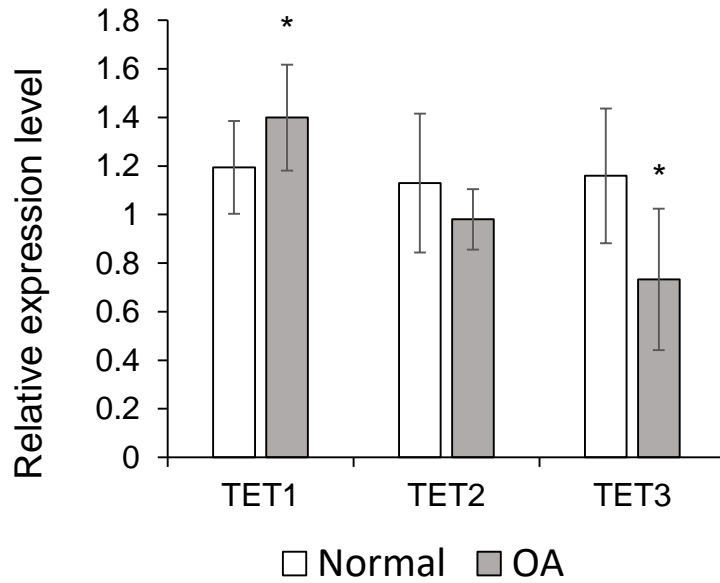

**Supplementary Figure S1**

**The TETs expression in normal and OA-affected human cartilage tissue.**

**TWIST1 gene expression in cartilage tissues from 6 normal donors and 6 OA donors were analyzed by real-time PCR. TETs gene expression levels in OA cartilage tissues are relative to normal cartilage tissues. Values are the mean  $\pm$  SEM ratio.**

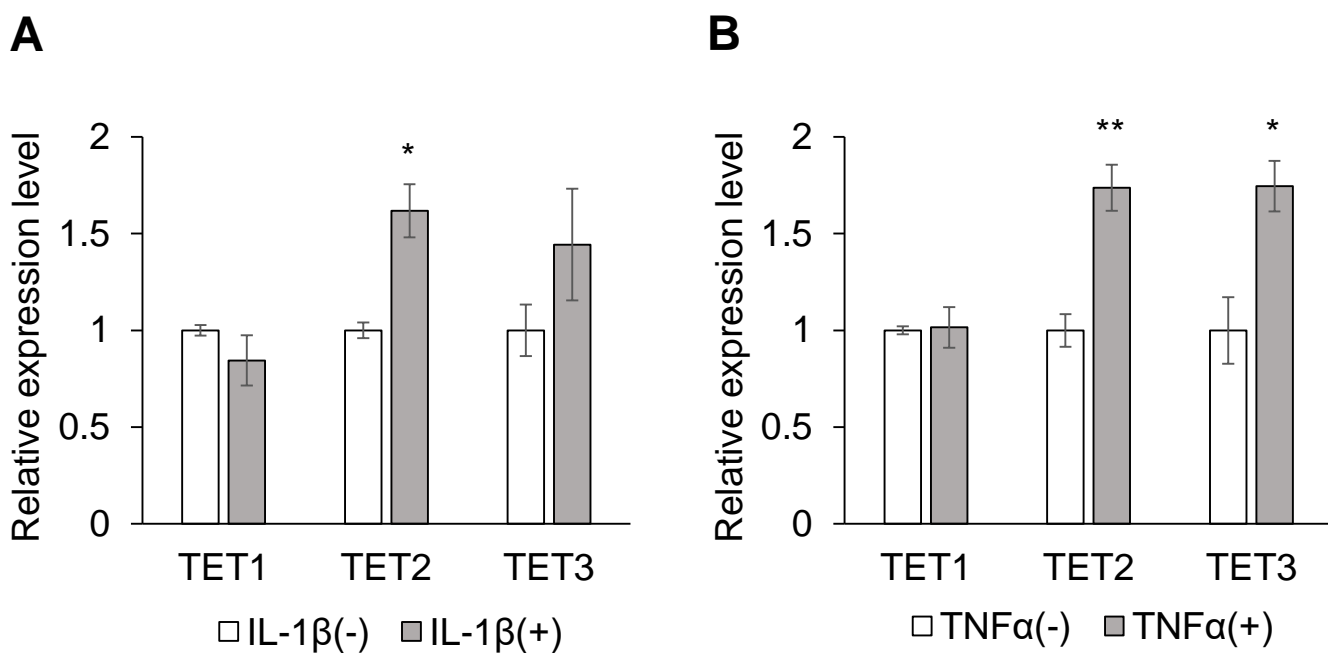

**Supplementary Figure S2**

The TETs expression change after IL-1 $\beta$  or TNF $\alpha$  stimulation in human chondrocytes. **A**, The relative TETs expression after IL-1 $\beta$  stimulation. **B**, The relative TETs expression after TNF $\alpha$  stimulation. Values are the mean  $\pm$  SEM ratio. \* = P < 0.05, \*\* = P < 0.01.

## Supplementary Materials and Methods

### **Quantitative real-time PCR analysis.**

To confirm the TETs gene expression in human normal and OA chondrocytes, the chondrocytes were seeded on 6-well plates 24 hours before Ad-GFP or Ad-TWIST1 infection at an MOI of 100 PFUs/cell. 72 hours after viral infection, the TETs gene expressions were analyzed by real-time qRT-PCR. To confirm the TETs expression change after IL-1 $\beta$  or TNF $\alpha$  stimulation in human chondrocytes, the chondrocytes were seeded on 6-well plates 24 hours before IL-1 $\beta$  or TNF $\alpha$  stimulation. After 12 hours cytokine treatment, TETs gene expression were analyzed by real-time qRT-PCR.
